# Supplementary material
Source: PubMed Central journal article supplement (PMC6486738)
Supplement: pnas.1815745116.sapp.pdf [file pnas.1815745116.sapp.pdf]

## Supplementary Information for

### **Ebolavirus polymerase uses an unconventional genome replication mechanism**

Laure R. Deflubé, Tessa N. Cressey, Adam Hume, Judith Olejnik<sup>2</sup>, Elaine Haddock, Friederike Feldmann, Hideki Ebihara, Rachel Fearn, and Elke Mühlberger

Rachel Fearn and Elke Mühlberger  
Email: [rfearn@bu.edu](mailto:rfearn@bu.edu), [muehlber@bu.edu](mailto:muehlber@bu.edu)

#### **This PDF file includes:**

Figs. S1 to S5  
Tables S1 to S3

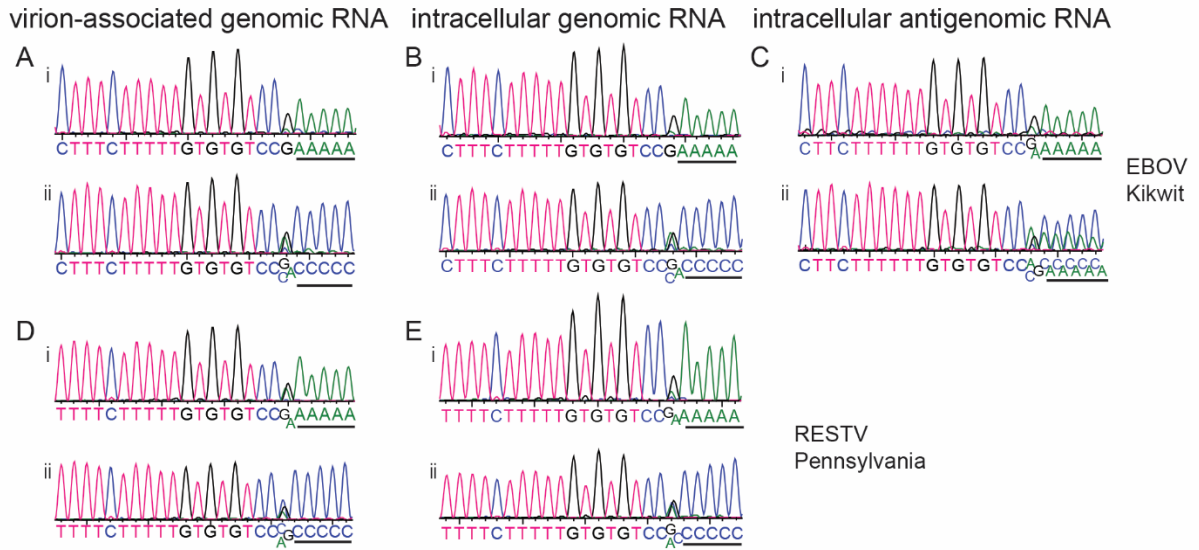

**Fig. S1.** Sequence analysis of the 3' ends of EBOV Kikwit and RESTV Pennsylvania genomic and antigenomic RNAs. Vero cells were infected with EBOV Kikwit (A-C) or RESTV Pennsylvania (D, E) and virion-associated or total cellular RNA was used for RACE analysis. The traces show sequences of the 3' RACE PCR population obtained from virion-associated RNA purified from cell supernatants (A and D), intracellular genome RNA (B and E), or intracellular antigenome RNA (C). In each case, panels i and ii show results from RNA tailed with ATP and CTP, respectively.

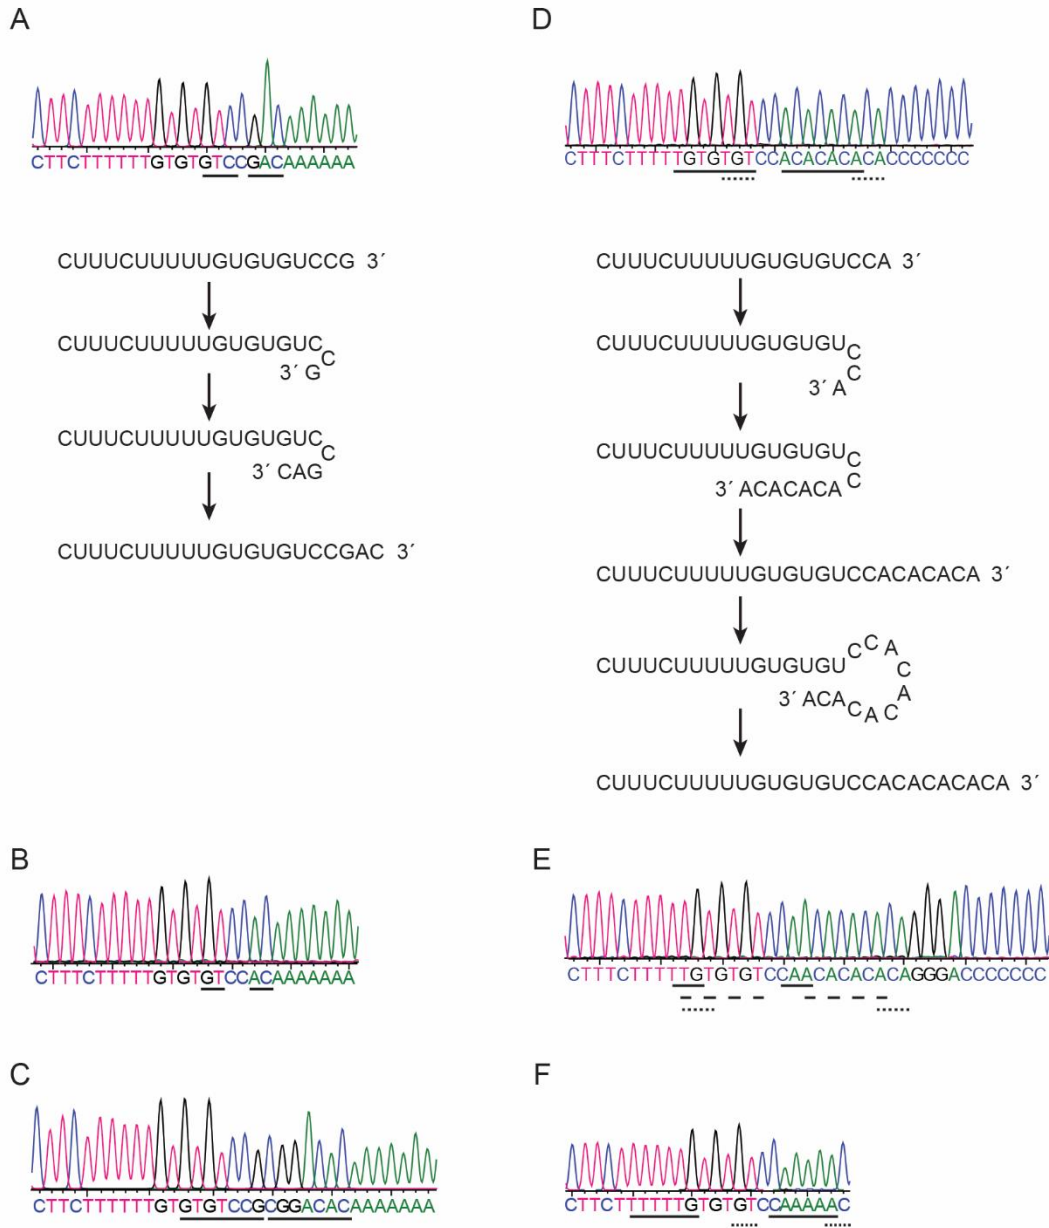

**Fig. S2.** Schematic diagram illustrating how longer 3' terminal sequences could have been added by back-priming. (A-C) Sequence traces that show evidence of nucleotide additions that could have occurred by virtue of a single back-priming event. (D-F) Sequence traces that show evidence of nucleotide additions that could have occurred by virtue of multiple back-priming events. The palindromic sequences are underlined. In D-F palindromes that could have arisen as a consequence of the second or third back-priming event are underlined with dotted and dashed lines. Panels A and D illustrate the steps that could have occurred for nucleotides to have been added. Note that in most cases, there are other back-

priming possibilities and that in panel E, there is some sequence that cannot be explained by back-priming within the terminal region of the genome.

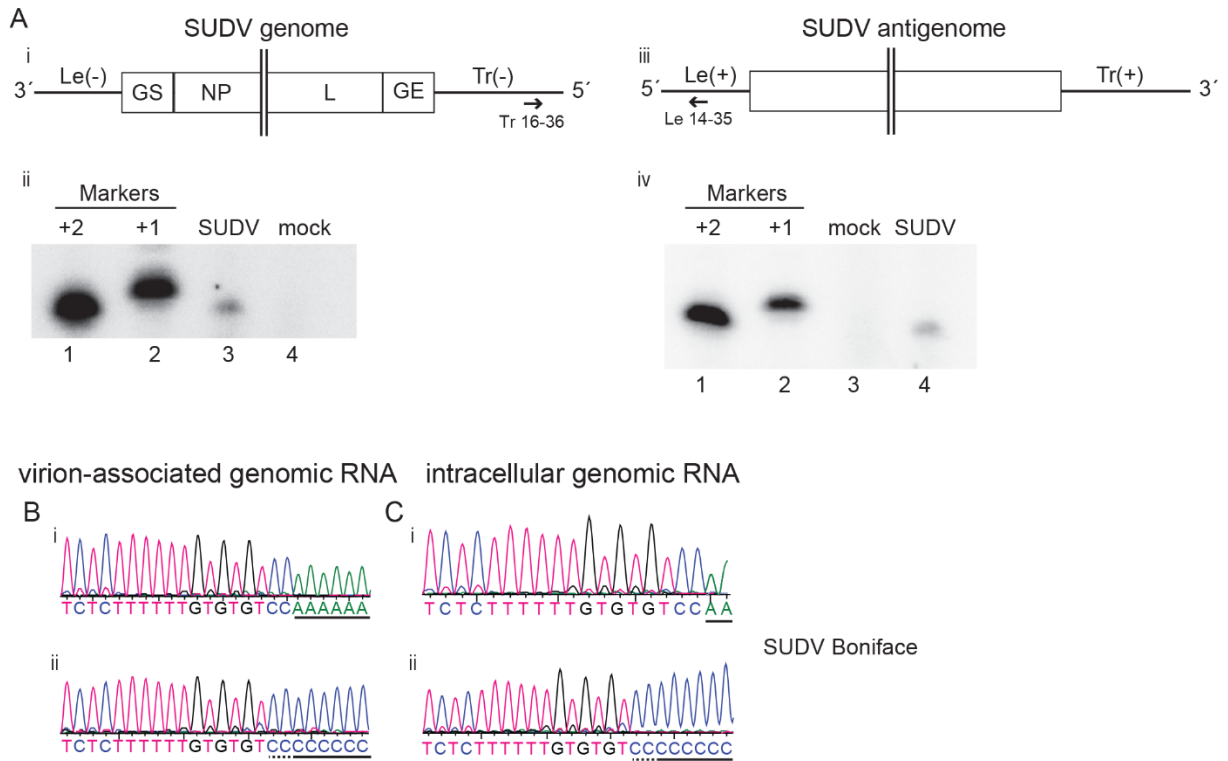

**Fig. S3.** Analysis of the 5' ends of SUDV RNAs. (A) Primer extension mapping of the 5' ends of SUDV genome and antigenome RNAs. (i and iii) Schematic diagrams (not to scale) of the SUDV genome and antigenome showing the annealing positions of the positive (i) and negative (iii) sense primers used for primer extension analysis. (ii and iv) Primer extension analysis of genomic and antigenomic SUDV RNA (SUDV) isolated from infected Vero cells, analyzed with a positive or negative sense primer (ii and iv, respectively). RNA from mock-infected cells (mock) was used as a negative control. [ $\gamma$ - $^{32}$ P]ATP end-labeled DNA oligonucleotides corresponding in length and sequence to the respective cDNA representing initiation from positions +1 and +2, relative to the published sequence were used as markers. (B and C) Vero cells were infected with SUDV isolate Boniface and the 5' ends of virion-associated (B) or total intracellular genome RNA (C) were amplified by 5' RACE. The cDNA was tailed with dATP (i) or dCTP (ii). The black line below the sequence traces indicates poly(A) or poly(C) tail sequences that were added to the virus-specific sequence during 5' RACE. This may include some virus-specific sequence that cannot be distinguished from the poly(A) or poly(C) tail. The first two C

residues that belong to the viral sequence are underlined with a dotted line in the poly(C)-tailed sequence traces.

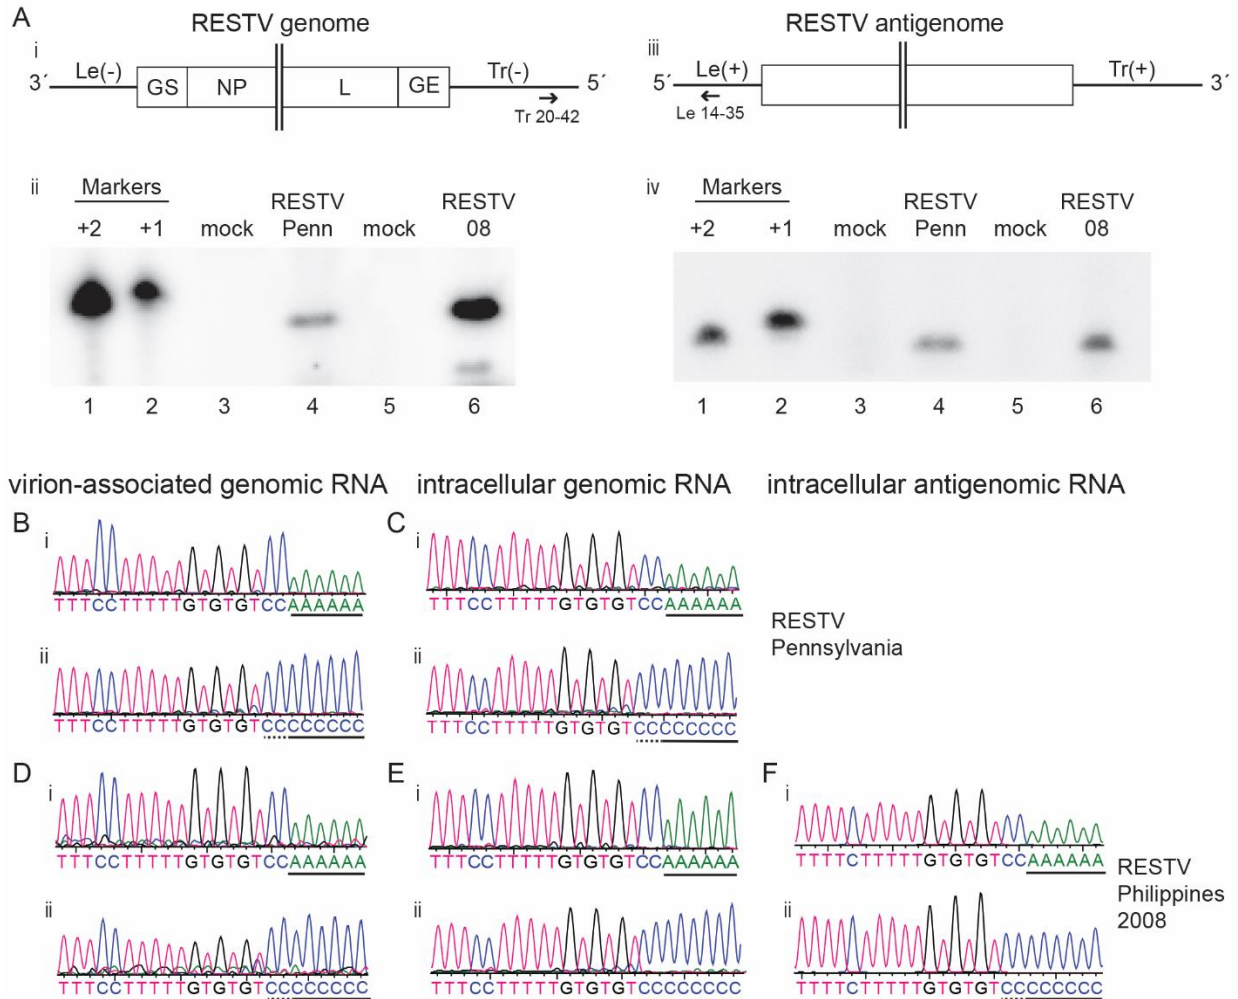

**Fig. S4.** Analysis of the 5' ends of RESTV RNAs. (A) Primer extension mapping of the 5' ends of RESTV genome and antigenome RNAs. (i and iii) Schematic diagrams (not to scale) of the RESTV genome and antigenome showing the annealing positions of the positive (i) and negative (iii) sense primers used for primer extension analysis. (ii and iv) Primer extension analysis of genomic and antigenomic RNA from RESTV isolates Pennsylvania (RESTV Penn) and Philippines 08 (RESTV 08). Total cellular RNA was isolated from infected Vero cells and analyzed with a positive (ii) or negative (iv) sense primer. RNA from mock-infected cells (mock) was used as a negative control. [ $\gamma$ - $^{32}$ P]ATP end-labeled DNA oligonucleotides corresponding in length and sequence to the respective cDNA representing initiation from positions +1 and +2 relative to the published sequence were used as markers. (B-F) Vero cells were infected with RESTV isolate Pennsylvania

(B, C) or RESTV isolate Philippines 2008 (D-F), and the 5' ends of virion-associated (B, D), intracellular genomic viral RNA (C, E) or intracellular antigenomic viral RNA (F) were amplified by 5' RACE. The cDNA was tailed with dATP (i) or dCTP (ii). The black line below the sequence traces indicates poly(A) or poly(C) tail sequences that were added to the virus-specific sequence during 5' RACE. This may include some virus-specific sequence that cannot be distinguished from the poly(A) or poly(C) tail. The first two C residues that belong to the viral sequence are underlined with a dotted line in the poly(C)-tailed sequence traces.



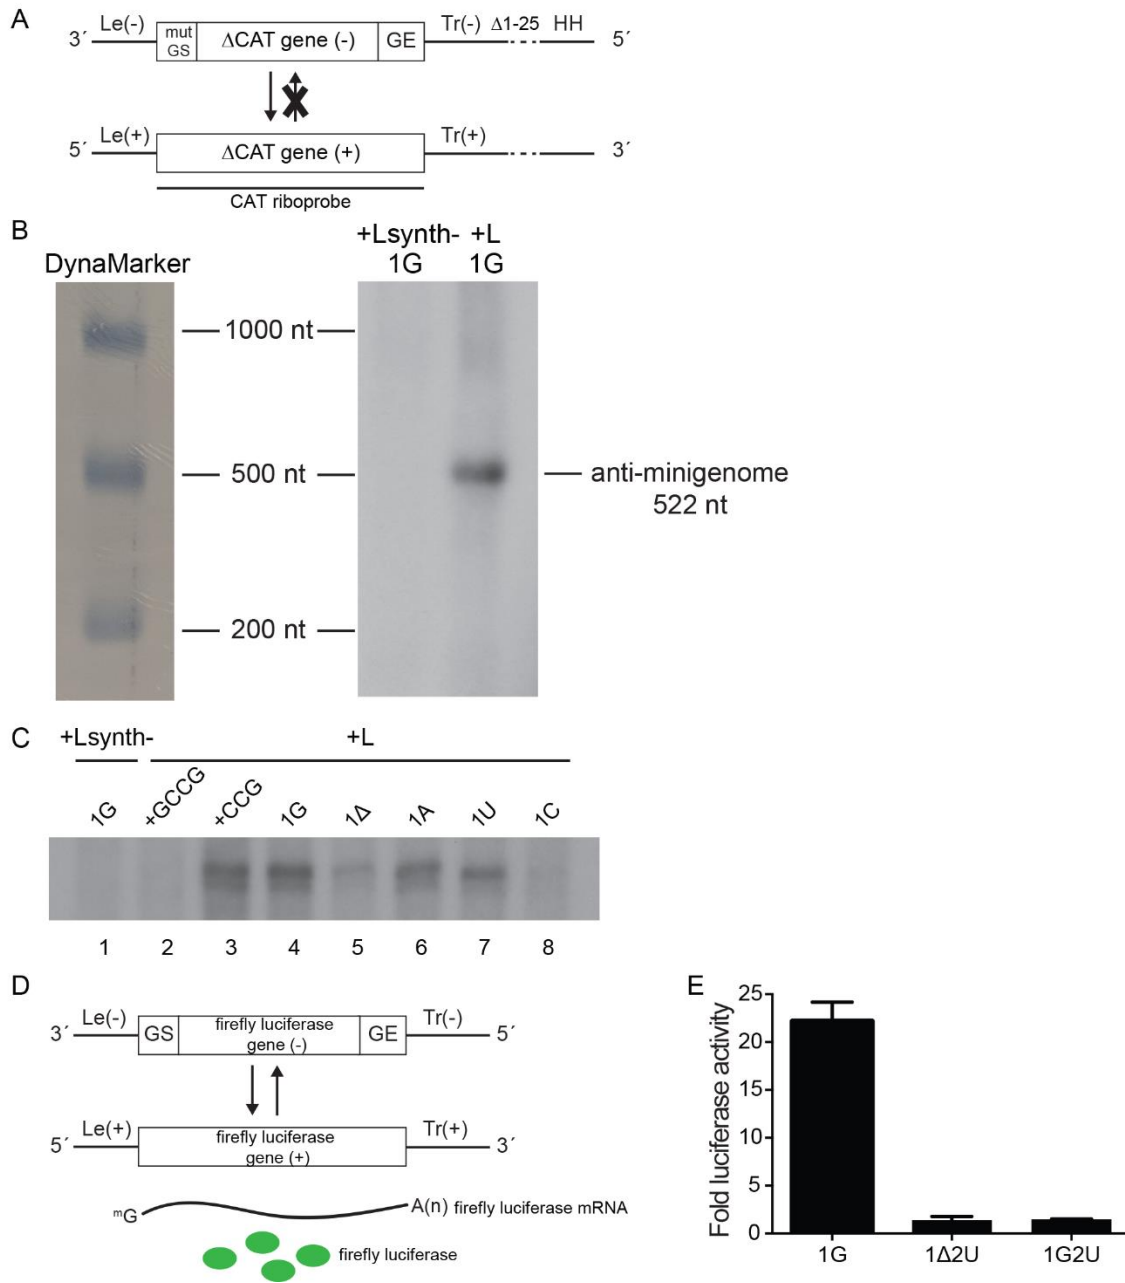

**Fig. S5.** Analysis of mutant EBOV minigenomes with different 3' ends. (A) Schematic diagram (not to scale) showing the organization of the single-cycle replicating, non-transcribing EBOV minigenome and the anti-minigenome product. The terminal 25 nucleotides of the trailer were deleted ( $\Delta 1-25$ ). The trailer is flanked by an inactive hammerhead ribozyme (HH). The annealing position of the negative sense primer used for primer extension is indicated; mut GS, mutated gene start signal; GE, gene end signal.

Annealing position of riboprobe indicated. (B) Northern blot analysis of anti-minigenome RNA products using a negative sense riboprobe specific to the  $\Delta$ CAT sequence. DynaMarker Prestain Marker for RNA High was run alongside RNA products on the same gel. Left panel, image of membrane following transfer of RNA. Right panel, autoradiography image. (C) Northern blot analysis of anti-minigenome RNA products using a negative sense riboprobe specific to the  $\Delta$ CAT sequence. The experiment was performed three times and a representative blot is shown. (D) Schematic diagram (not to scale) showing the replication- and transcription-competent EBOV minigenome expressing a luciferase reporter gene (3E5E-Luc), the corresponding anti-minigenome product, firefly luciferase mRNA, and firefly luciferase. GS, gene start signal; GE, gene end signal. (E) HEK 293T cells were infected with minigenome plasmid 3E5E-Luc along with plasmids encoding the EBOV proteins required for replication and transcription (NP, VP35, VP30, and L), the T7 RNA polymerase, and a plasmid encoding  $\beta$ -galactosidase. As a negative control, L was replaced with the replication-deficient L mutant, L<sub>synth-<sup>-</sup></sub>. Two days post transfection, cell lysates were harvested and luciferase and  $\beta$ -galactosidase activities were measured. Luciferase values were normalized to account for differences in transfection efficiency by dividing by the corresponding  $\beta$ -galactosidase values. Fold luciferase activity was calculated by dividing the luciferase value of the wild-type L samples by the values of the corresponding samples with L<sub>synth-<sup>-</sup></sub>. The experiment was performed three times and the mean of the results is shown. Standard error of the mean (SEM) for this figure was calculated using GraphPad Prism software.

**Table S1. Terminal nucleotides of ebolavirus genomes deposited in GenBank.** Sequences highlighted in yellow are representative for more than one sequence as indicated below.

<sup>a</sup> KU182909: Ebola virus Kikwit. 7 out of 12 sequences with 3' GCC and GGU 5' genome ends (9510622, 9510627, 9510628, 9510629, 9510630, 9510631, 9510632).

<sup>b</sup> U182904: Ebola virus Kikwit. 5 out of 12 sequenced isolates with 3' GCC and GGG 5' genome ends (9510621, 9510623, 9510624, 9510625, 9510626).

<sup>c</sup> KY426733: Ebola virus Makona. 50 sequences with 3' GCC and GGU 5' genome ends (J0176 – J0225).

<sup>d</sup> KU143831: Ebola virus Makona. 60 sequences with 3' GCC and GGU 5' genome ends (S1-S60).

<sup>e</sup> KR074996: Ebola virus Makona. 8 sequences with 3' GCC and GG 5' genome ends (DQE1, DQE3, DQE4, DQE5, DQE6, DQE12, DQE13, DQE14).

<sup>f</sup> KP260799: Ebola virus Makona. 4 sequences with 3' GCC and GG 5' genome ends (DPR1-DPR4).

| GenBank            | Isolate                                                                                     | 3' ends | 5' ends |
|--------------------|---------------------------------------------------------------------------------------------|---------|---------|
| <b>Ebola virus</b> |                                                                                             |         |         |
| MH121168           | Zaire ebolavirus isolate Ebola virus/H.sapiens-tc/Zaire/1976/Mayinga-R3816, complete genome | 3' GCC  | GG 5'   |
| MH121166           | Zaire ebolavirus isolate Ebola virus/H.sapiens-tc/COD/1976/Yambuku-Mayinga, complete genome | 3' CC   | GG 5'   |
| NC_002549          | Zaire ebolavirus isolate Ebola virus/H.sapiens-tc/COD/1976/Yambuku-Mayinga, complete genome | 3' GCC  | GGU 5'  |
| EU224440           | Zaire ebolavirus strain Mayinga, complete genome                                            | 3' GCC  | GGU 5'  |
| AY142960           | Zaire Ebola virus strain Mayinga subtype Zaire, complete genome                             | 3' GCC  | GGU 5'  |
| AF272001           | Zaire Ebola virus strain Mayinga, complete genome                                           | 3' GCC  | GGU 5'  |
| AF086833           | Ebola virus - Mayinga, Zaire, 1976, complete genome                                         | 3' GCC  | GGU 5'  |
| KR063671           | Ebola virus isolate Ebola virus/H.sapiens-tc/COD/1976/Yambuku-Mayinga, complete genome      | 3' CC   | GG 5'   |
| KC242801           | Zaire ebolavirus isolate EBOV/H.sapiens-tc/COD/1976/deRoover, complete genome               | 3' GCC  | GGU 5'  |
| KC242791           | Zaire ebolavirus isolate EBOV/H.sapiens-tc/COD/1977/Bonduni, complete genome                | 3' GCC  | GGU 5'  |
| KC242792           | Zaire ebolavirus isolate EBOV/H.sapiens-tc/GAB/1994/Gabon, complete genome                  | 3' GCC  | GGU 5'  |
| AY354458           | Zaire ebolavirus strain Zaire 1995, complete genome                                         | 3' GCC  | GGUU 5' |
| KR867676           | Zaire ebolavirus isolate Ebola virus/H.sapiens-tc/COD/1995/Kikwit-9510621, complete genome  | 3' CC   | GG 5'   |
| MH121165           | Zaire ebolavirus isolate Ebola virus/H.sapiens-tc/COD/1995/Kikwit-9510621, complete genome  | 3' GCC  | GGU 5'  |

|                       |                                                                                                        |        |        |
|-----------------------|--------------------------------------------------------------------------------------------------------|--------|--------|
| MH121164              | Zaire ebolavirus isolate Ebola virus/H.sapiens-tc/COD/1995/Kikwit-9510621, complete genome             | 3' GCC | GG 5'  |
| KT762962              | Zaire ebolavirus isolate Ebola virus/H.sapiens-tc/COD/1995/Kikwit-9510621 clone R4415, complete genome | 3' GCC | GG 5'  |
| KT762961              | Zaire ebolavirus isolate Ebola virus/H.sapiens-tc/COD/1995/Kikwit-9510621 clone R4414, complete genome | 3' GCC | GG 5'  |
| KC242799              | Zaire ebolavirus isolate EBOV/H.sapiens-tc/COD/1995/13709 Kikwit, complete genome                      | 3' GCC | GGU 5' |
| KC242796              | Zaire ebolavirus isolate EBOV/H.sapiens-tc/COD/1995/13625 Kikwit, complete genome                      | 3' GCC | GGU 5' |
| KU182909 <sup>a</sup> | Ebola virus isolate Ebola virus/H. sapiens-tc/COD/1995/Kikwit-9510622, complete genome                 | 3' GCC | GGU 5' |
| KU182904 <sup>b</sup> | Ebola virus isolate Ebola virus/H. sapiens-tc/COD/1995/Kikwit-9510626, complete genome                 | 3' GCC | GGG 5' |
| KC242798              | Zaire ebolavirus isolate EBOV/H.sapiens-tc/GAB/1996/1Ikot, complete genome                             | 3' GCC | GGU 5' |
| KC242797              | Zaire ebolavirus isolate EBOV/H.sapiens-tc/GAB/1996/1Oba, complete genome                              | 3' GCC | GGU 5' |
| KC242795              | Zaire ebolavirus isolate EBOV/H.sapiens-tc/GAB/1996/1Mbie, complete genome                             | 3' GCC | GGU 5' |
| KC242794              | Zaire ebolavirus isolate EBOV/H.sapiens-tc/GAB/1996/2Nza, complete genome                              | 3' GCC | GGU 5' |
| KC242793              | Zaire ebolavirus isolate EBOV/H.sapiens-tc/GAB/1996/1Eko, complete genome                              | 3' GCC | GGU 5' |
| KC242800              | Zaire ebolavirus isolate EBOV/H.sapiens-tc/GAB/2002/Ilembe, complete genome                            | 3' GCC | GGU 5' |
| KC242790              | Zaire ebolavirus isolate EBOV/H.sapiens-tc/COD/2007/5 Luebo, complete genome                           | 3' GCC | GGU 5' |
| KC242785              | Zaire ebolavirus isolate EBOV/H.sapiens-tc/COD/2007/0 Luebo, complete genome                           | 3' GCC | GGU 5' |
| KC242789              | Zaire ebolavirus isolate EBOV/H.sapiens-tc/COD/2007/4 Luebo, complete genome                           | 3' GCC | GGU 5' |
| KC242788              | Zaire ebolavirus isolate EBOV/H.sapiens-tc/COD/2007/43 Luebo, complete genome                          | 3' GCC | GGU 5' |
| KC242787              | Zaire ebolavirus isolate EBOV/H.sapiens-tc/COD/2007/23 Luebo, complete genome                          | 3' GCC | GGU 5' |
| KC242786              | Zaire ebolavirus isolate EBOV/H.sapiens-tc/COD/2007/1 Luebo, complete genome                           | 3' GCC | GGU 5' |
| KC242784              | Zaire ebolavirus isolate EBOV/H.sapiens-tc/COD/2007/9 Luebo, complete genome                           | 3' GCC | GGU 5' |

|                       |                                                                                                                |        |        |
|-----------------------|----------------------------------------------------------------------------------------------------------------|--------|--------|
| KP096422              | Zaire ebolavirus isolate H.sapiens-tc/GIN/14/WPG-C15, complete genome (Makona)                                 | 3' GCC | GG 5'  |
| KP096421              | Zaire ebolavirus isolate H.sapiens-tc/GIN/14/WPG-C07, complete genome (Makona)                                 | 3' GCC | GG 5'  |
| KP096420              | Zaire ebolavirus isolate H.sapiens-tc/GIN/14/WPG-C05, complete genome (Makona)                                 | 3' GCC | GG 5'  |
| KJ660348              | Zaire ebolavirus isolate H.sapiens-wt/GIN/2014/Makona-Gueckedou-C05, complete genome                           | 3' GCC | GGU 5' |
| KJ660347              | Zaire ebolavirus isolate H.sapiens-wt/GIN/2014/Makona-Gueckedou-C07, complete genome                           | 3' GCC | GGU 5' |
| KJ660346              | Zaire ebolavirus isolate H.sapiens-wt/GIN/2014/Makona-Kissidougou-C15, complete genome                         | 3' GCC | GGU 5' |
| KT589389              | Zaire ebolavirus isolate Ebola virus/H. sapiens-wt/SLE/2014/Makona-201409581, complete genome                  | 3' GCC | G 5'   |
| KT589390              | Zaire ebolavirus isolate Ebola virus/H.sapiens-wt/SLE/2014/Makona-201403164, complete genome                   | 3' GCC | G 5'   |
| KP178538              | Zaire ebolavirus isolate Ebolavirus/H.sapiens-wt/LIB/2014/Makona-201403007, complete genome                    | 3' GCC | GG 5'  |
| KP240935              | Zaire ebolavirus isolate Ebola virus/H.sapiens-wt/USA/2014/Makona-201403305, complete genome                   | 3' GCC | GG 5'  |
| KP240934              | Zaire ebolavirus isolate Ebola virus/H.sapiens-wt/USA/2014/Makona-201403293, complete genome                   | 3' GCC | GG 5'  |
| KP240933              | Zaire ebolavirus isolate Ebola virus/H.sapiens-wt/LBR/2014/Makona-201403275, complete genome                   | 3' GCC | GG 5'  |
| KP240932              | Zaire ebolavirus isolate Ebola virus/H.sapiens-wt/LBR/2014/Makona-201403261, complete genome                   | 3' GCC | GG 5'  |
| KP240931              | Zaire ebolavirus isolate Ebola virus/H.sapiens-wt/SLE/2014/Makona-201403147, complete genome                   | 3' GCC | GG 5'  |
| KP342330              | Zaire ebolavirus isolate H.sapiens-wt/GIN/2014/Conacry-192, complete genome                                    | 3' GCC | GG 5'  |
| MF599505              | Zaire ebolavirus isolate Ebola virus/H.sapiens-wt/CCDC/2015/sierra leone/IVDC4_Patient_4_Day7, complete genome | 3' CC  | GG 5'  |
| KY426733 <sup>c</sup> | Zaire ebolavirus isolate Ebola virus/H.sapiens-wt/SLE/2015/Makona-J0225, complete genome                       | 3' GCC | GGU 5' |
| KU143831 <sup>d</sup> | Zaire ebolavirus isolate Ebola virus H.sapiens-wt/SLE/2014/Makona-S60, complete genome                         | 3' GCC | GGU 5' |
| KR074996 <sup>e</sup> | Zaire ebolavirus isolate Ebola virus H.sapiens-wt/LBR/2014/Makona-Liberia-DQE1, complete genome                | 3' GCC | GG 5'  |
| KR781608              | Zaire ebolavirus strain Ebola virus/H.sapiens-rec/LBR/2014/Makona-L2014, complete genome                       | 3' CC  | GG 5'  |
| KP260799 <sup>f</sup> | Zaire ebolavirus isolate Ebola virus/H.sapiens-wt/MLI/2014/Makona-Mali-DPR1, complete genome                   | 3' GCC | GG 5'  |

|                    |                                                                                                        |        |        |
|--------------------|--------------------------------------------------------------------------------------------------------|--------|--------|
| KM034562           | Zaire ebolavirus isolate Ebola virus/H.sapiens-wt/SLE/2014/Makona-G3686.1, complete genome             | 3' GCC | G 5'   |
| KM233113           | Zaire ebolavirus isolate Ebola virus/H.sapiens-wt/SLE/2014/Makona-G3856.1, complete genome             | 3' GCC | GG 5'  |
| KM233109           | Zaire ebolavirus isolate Ebola virus/H.sapiens-wt/SLE/2014/Makona-G3846, complete genome               | 3' GCC | GG 5'  |
| KM233070           | Zaire ebolavirus isolate Ebola virus/H.sapiens-wt/SLE/2014/Makona-G3770.2, complete genome             | 3' GCC | GGU 5' |
| KM233069           | Zaire ebolavirus isolate Ebola virus/H.sapiens-wt/SLE/2014/Makona-G3770.1, complete genome             | 3' GCC | GG 5'  |
| KM233056           | Zaire ebolavirus isolate Ebola virus/H.sapiens-wt/SLE/2014/Makona-G3735.1, complete genome             | 3' CC  | GG 5'  |
| KM233053           | Zaire ebolavirus isolate Ebola virus/H.sapiens-wt/SLE/2014/Makona-G3724, complete genome               | 3' CC  | GG 5'  |
| LT605058           | Ebola virus isolate Ebola virus Makona isolate Frankfurt genome assembly, complete genome: monopartite | 3' GCC | GGU 5' |
| <b>Sudan virus</b> |                                                                                                        |        |        |
| KT878488           | Sudan ebolavirus isolate Sudan virus/C.porcellus-lab/SSD/1976/Nzara-Boniface, complete genome          | 3' GCC | GGU 5' |
| FJ968794           | Sudan ebolavirus strain Boniface, complete genome                                                      | 3' GCC | GGU 5' |
| KT750754           | Sudan ebolavirus isolate Boniface, complete genome                                                     | 3' GCC | GGU 5' |
| KR063670           | Sudan ebolavirus isolate Ebola virus/H.sapiens-tc/UGA/2000/Gulu-808892, complete genome                | 3' GCC | GGG 5' |
| NC_006432          | Sudan ebolavirus isolate Sudan virus/H.sapiens-tc/UGA/2000/Gulu-808892, complete genome                | 3' GCC | GGU 5' |
| KU182912           | Sudan ebolavirus isolate Sudan virus/H. sapiens-tc/SDN/2000/Gulu-200011676, complete genome            | 3' GCC | GGG 5' |
| AY729654           | Sudan ebolavirus strain Gulu, complete genome                                                          | 3' GCC | GGU 5' |
| KC545392           | Sudan ebolavirus isolate EboSud-682 2012, complete genome                                              | 3' GCC | GG 5'  |
| KC545391           | Sudan ebolavirus isolate EboSud-609 2012, complete genome                                              | 3' GCC | GG 5'  |
| KC545390           | Sudan ebolavirus isolate EboSud-603 2012, complete genome                                              | 3' GCC | GG 5'  |
| KC545389           | Sudan ebolavirus isolate EboSud-602 2012, complete genome                                              | 3' GCC | GG 5'  |
| KC589025           | Sudan ebolavirus isolate EboSud-639, complete genome                                                   | 3' GCC | GGU 5' |
| KC242783           | Sudan ebolavirus isolate SUDV/H.sapiens-tc/SSD/1979/Maleo, complete genome                             | 3' GCC | GGU 5' |
| JN638998           | Sudan ebolavirus - Nakisamata, complete genome                                                         | 3' GCC | GGU 5' |
| EU338380           | Sudan ebolavirus isolate EBOV-S-2004 from Sudan, complete genome                                       | 3' GCC | GGU 5' |

| <b>Reston virus</b>     |                                                                                                                |        |        |
|-------------------------|----------------------------------------------------------------------------------------------------------------|--------|--------|
| KY798004                | Reston ebolavirus isolate USA_PA_1989_(813159), complete genome                                                | 3' GCC | GG 5'  |
| JX477166                | Reston ebolavirus isolate RESTV/M.fascicularis-tc/PHL-USA/1996/Ferlite, Philippines/Alice, TX, complete genome | 3' GCC | GG 5'  |
| NC_004161               | Reston ebolavirus isolate Reston virus/M.fascicularis-tc/USA/1989/Philippines89-Pennsylvania, complete genome  | 3' GCC | GG 5'  |
| KY008770                | Reston ebolavirus strain Reston virus/M.fascicularis-tc/USA/1989/Philippines89-AZ-1435, complete genome        | 3' GCC | GG 5'  |
| AY769362                | Reston ebolavirus strain Pennsylvania, complete genome                                                         | 3' GCC | GGU 5' |
| AB050936                | Reston ebolavirus - Reston genomic RNA, complete genome                                                        | 3' CCC | GGG 5' |
| AF522874                | Reston Ebola virus strain Pennsylvania, complete genome                                                        | 3' GCC | GG 5'  |
| <b>Bundibugyo virus</b> |                                                                                                                |        |        |
| KC545396                | Bundibugyo ebolavirus isolate EboBund-14 2012, complete genome                                                 | 3' GCC | GG 5'  |
| KC545395                | Bundibugyo ebolavirus isolate EboBund-122 2012, complete genome                                                | 3' GCC | GG 5'  |
| KC545394                | Bundibugyo ebolavirus isolate EboBund-120 2012, complete genome                                                | 3' GCC | GG 5'  |
| KC545393                | Bundibugyo ebolavirus isolate EboBund-112 2012, complete genome                                                | 3' GCC | GG 5'  |
| FJ217161                | Bundibugyo ebolavirus, complete genome                                                                         | 3' GCC | GGU 5' |
| KR063673                | Bundibugyo virus isolate Bundibugyo virus/H.sapiens-tc/UGA/2007/Butalya-811250, complete genome                | 3' GCC | GGU 5' |
| KU182911                | Bundibugyo virus isolate Bundibugyo virus/H. sapiens-tc/UGA/2007/Bundibugyo-200706291, complete genome         | 3' GCC | GG 5'  |
| <b>Tai Forest virus</b> |                                                                                                                |        |        |
| KU182910                | Tai Forest ebolavirus isolate Tai Forest virus/H. sapiens-tc/CIV/1994/Tai Forest-CDC807212, complete genome    | 3' GCC | GGU 5' |
| NC_014372               | Tai Forest ebolavirus isolate Tai Forest virus/H.sapiens-tc/CIV/1994/Pauleoula-CI, complete genome             | 3' GCC | GGU 5' |
| FJ217162                | Cote d'Ivoire ebolavirus, complete genome                                                                      | 3' GCC | GGU 5' |
| <b>Bombali virus</b>    |                                                                                                                |        |        |
| MF319185                | Bombali ebolavirus isolate Bombali ebolavirus/Mops condylurus/SLE/2016/PREDICT_SLAB000156, complete genome     | 3' GCC | GGA 5' |
| MF319186                | Bombali ebolavirus isolate Bombali ebolavirus/Chaerephon pumilus/SLE/2016/PREDICT_SLAB000047, complete genome  | 3' GCC | GGA 5' |





**Table S2. Sequence analysis of 3' and 5' ends of EBOV Mayinga genomic and antigenomic RNAs.** Additional nucleotides upstream of the 3' CCUGU sequence or downstream of the ACAGG 5' terminus are underlined. \* Also could be C(n)CCUGU. ‡ Also could be ACAGGG(n).

| sequence                       | source of RNA | strand sense | tailing | number of clones |      |
|--------------------------------|---------------|--------------|---------|------------------|------|
| 3' <u>G</u> CCUGU              | virion        | genome       | A       | 3/12             |      |
| 3' <u>A</u> CCUGU or           |               |              |         | 8/12             |      |
| 3' <u>C</u> CCUGU              |               |              |         |                  |      |
| 3' <u>U</u> CCUGU              |               |              |         |                  |      |
| 3' <u>G</u> CCUGU              | virion        | genome       | C       | 1/10             |      |
| 3' <u>A</u> CCUGU              |               |              |         | 5/10             |      |
| 3' <u>C</u> CCUGU*             |               |              |         | 2/10             |      |
| 3' <u>U</u> ACCUGU             |               |              |         | 1/10             |      |
| 3' <u>ACACACAC</u> ACCUGU      |               |              |         | 1/10             |      |
| 3' <u>G</u> CCUGU              | cellular      | genome       | A       | 6/11             |      |
| 3' <u>A</u> CCUGU or           |               |              |         | 3/11             |      |
| 3' <u>C</u> CCUGU              |               |              |         |                  |      |
| 3' <u>C</u> ACCUGU             |               |              |         |                  | 1/11 |
| 3' <u>CAAC</u> ACCUGU          | 1/11          |              |         |                  |      |
| 3' <u>G</u> CCUGU              | cellular      | genome       | C       | 3/9              |      |
| 3' <u>A</u> CCUGU              |               |              |         | 4/9              |      |
| 3' <u>C</u> CCUGU*             |               |              |         | 1/9              |      |
| 3' <u>AGGGACACACACA</u> ACCUGU |               |              |         | 1/9              |      |
| 3' <u>G</u> CCUGU              | cellular      | antigenome   | A       | 4/14             |      |
| 3' <u>A</u> CCUGU or           |               |              |         | 7/14             |      |
| 3' <u>C</u> CCUGU              |               |              |         |                  |      |
| 3' <u>C</u> UGU                |               |              |         |                  | 1/14 |
| 3' <u>CAGC</u> CCUGU           |               |              |         |                  | 1/14 |
| 3' <u>CACAGGCG</u> CCUGU       | 1/14          |              |         |                  |      |
| 3' <u>G</u> CCUGU              | cellular      | antigenome   | C       | 1/6              |      |
| 3' <u>A</u> CCUGU              |               |              |         | 1/6              |      |
| 3' <u>C</u> CCUGU*             |               |              |         | 1/6              |      |
| 3' <u>CAAAA</u> ACCUGU         |               |              |         | 3/6              |      |
| <u>ACAGG</u> 5'                | virion        | genome       | A       | 5/7              |      |
| <u>ACAGGUC</u> 5'              |               |              |         | 1/7              |      |
| <u>ACAGGC</u> 5'               |               |              |         | 1/7              |      |
| <u>ACAGG</u> 5'‡               | virion        | genome       | C       | 4/4              |      |
| <u>ACAGG</u> 5'                | cellular      | genome       | A       | 5/5              |      |
| <u>ACAGG</u> 5'‡               | cellular      | genome       | C       | 6/6              |      |

**Table S3. Primers used in this study.** RT, reverse transcription.

| <b>Experiment</b>  | <b>Primer purpose</b>           | <b>Sequence (5' - 3')</b>                                                                     | <b>Primer #</b> |
|--------------------|---------------------------------|-----------------------------------------------------------------------------------------------|-----------------|
| 3' RACE genome     | RT primer – adaptor + tail      | <b>GAGGACTCGAGCTCAAGCATGCATTTTTTTTTTTTTTTTTTT or GAGGACTCGAGCTCAAGCATGCATGGGGGGGGGGGGGGGG</b> | 2720 or 2721    |
|                    | PCR primer 1 – tail adaptor     | <b>GAGGACTCGAGCTCAAGC</b>                                                                     | 2722            |
|                    | PCR primer 2 – EBOV-specific    | <b>GCTTGTTTGACTGTGAACTAATGCTG</b>                                                             | 2742            |
|                    | PCR primer 2 – SUDV-specific    | <b>CACTTATCAAGAAGGTTAGAATTG</b>                                                               | 2847            |
|                    | PCR primer 2 – RESTV-specific   | <b>GAACTTCTCGCGAAATGGATTG</b>                                                                 | 2768            |
| 5' RACE genome     | RT primer – EBOV-specific       | <b>GATAAAATTTAAAAGAAAAGGCAGGAC</b>                                                            | 2745            |
|                    | RT primer – SUDV-specific       | <b>ACAGCCAAAATATTTCTAGGGCCG</b>                                                               | 2850            |
|                    | RT primer – RESTV-specific      | <b>TTAAATGATAATGATCTTGGAAGCTCG</b>                                                            | 2771            |
|                    | PCR primer 1 - tail             | <b>GAGGACTCGAGCTCAAGCATGCATTTTTTTTTTTTTTTTTTT or GAGGACTCGAGCTCAAGCATGCATGGGGGGGGGGGGGGGG</b> | 2720 or 2721    |
|                    | PCR primer 2 – EBOV-specific    | <b>GATAAAATTTAAAAGAAAAGGCAGGAC</b>                                                            | 2745            |
|                    | PCR primer 2 – SUDV-specific    | <b>ACAGCCAAAATATTTCTAGGGCCG</b>                                                               | 2850            |
|                    | PCR primer 2 – RESTV-specific   | <b>TTAAATGATAATGATCTTGGAAGCTCG</b>                                                            | 2771            |
| 3' RACE antigenome | RT primer – adaptor + tail      | <b>GAGGACTCGAGCTCAAGCATGCATTTTTTTTTTTTTTTTTTT or GAGGACTCGAGCTCAAGCATGCATGGGGGGGGGGGGGGGG</b> | 2720 or 2721    |
|                    | PCR primer 1: tail adaptor      | <b>GAGGACTCGAGCTCAAGC</b>                                                                     | 2722            |
|                    | PCR primer 2 – EBOV-specific    | <b>AATGGTAATAGCCTTAATCTTTGTGTA</b>                                                            | 2744            |
|                    | PCR primer 2 – SUDV-specific    | <b>TTACATAAGTATTAAGAAAAAATTAC</b>                                                             | 2849            |
|                    | PCR primer 2 – RESTV-specific   | <b>GTCGCATTTAAACATGCTATCTTCAG</b>                                                             | 2770            |
| 5' RACE antigenome | RT primer – EBOV Le NP-VP35 IGR | <b>GGTTTTAATCTTCATCATTAG</b>                                                                  | 2881            |
|                    | RT primer – SUDV Le NP-VP35 IGR | <b>ATGAAGGTTTTAATCTTCATCATGGA</b>                                                             | 2885            |

|                                                                      |                                            |                                                                                               |                    |
|----------------------------------------------------------------------|--------------------------------------------|-----------------------------------------------------------------------------------------------|--------------------|
|                                                                      | RT primer –<br>RESTV Le NP-<br>VP35 IGR    | <b>ATGAAGGTTTTAATCTTCATCAAATG</b>                                                             | 2883               |
|                                                                      | PCR primer 1 –<br>tail                     | <b>GAGGACTCGAGCTCAAGCATGCATTTTTTTTTTTTTTTTT or<br/>GAGGACTCGAGCTCAAGCATGCATGGGGGGGGGGGGGG</b> | 2720<br>or<br>2721 |
|                                                                      | PCR primer 2 –<br>EBOV-specific<br>nested  | <b>GTCTGAGGTGGGACTTGTGATG</b>                                                                 | 2743               |
|                                                                      | PCR primer 2 –<br>SUDV-specific<br>nested  | <b>GTGGACTAAAGGGATACCTCGGG</b>                                                                | 2848               |
|                                                                      | PCR primer 2 –<br>RESTV-specific<br>nested | <b>GAAGAGTCCCAAGATCACTAGACATACC</b>                                                           | 2769               |
| EBOV<br>genome<br>primer<br>extension                                | RT primer –<br>Tr 17-41                    | <b>AATTTAAAAATAAATCTATTTCTTC</b>                                                              | 2739               |
|                                                                      | Tr 1-41 +1<br>marker                       | <b>AATTTAAAAATAAATCTATTTCTTCTTTTTTGTGTGTCCAA</b>                                              | 2741               |
|                                                                      | Tr 2-41 +2<br>marker                       | <b>AATTTAAAAATAAATCTATTTCTTCTTTTTTGTGTGTCCG</b>                                               | 2852               |
| EBOV<br>antigenome<br>and anti-<br>minigenome<br>primer<br>extension | RT primer –<br>Le 14-35 n                  | <b>GATCCTAAAAATTCTTCTTTCT</b>                                                                 | 2735               |
|                                                                      | Le 1-35 +1<br>marker                       | <b>GATCCTAAAAATTCTTCTTTCTTTTTTGTGTGTCCG</b>                                                   | 2737               |
|                                                                      | Le 2-35 +2<br>marker                       | <b>GATCCTAAAAATTCTTCTTTCTTTTTTGTGTGTCC</b>                                                    | 2851               |
| SUDV<br>genome<br>primer<br>extension                                | RT primer –<br>Tr 16-36                    | <b>TTAAAAAATCTGTATTTTCTC</b>                                                                  | 2963               |
|                                                                      | Tr 1-36 +1<br>marker                       | <b>TTAAAAAATCTGTATTTTCTCTTTTTTGTGTGTCCG</b>                                                   | 2964               |
|                                                                      | Tr 2-36 +2<br>marker                       | <b>TTAAAAAATCTGTATTTTCTCTTTTTTGTGTGTCC</b>                                                    | 3015               |
| SUDV<br>antigenome<br>primer<br>extension                            | RT primer –<br>Le 14-35                    | <b>AATCTTAAAAACTTTTCTTTCT</b>                                                                 | 2961               |
|                                                                      | Le 1-35 +1<br>marker                       | <b>AATCTTAAAAACTTTTCTTTCTTTTTTGTGTGTCCG</b>                                                   | 2962               |
|                                                                      | Le 2-35 +2<br>marker                       | <b>AATCTTAAAAACTTTTCTTTCTTTTTTGTGTGTCC</b>                                                    | 3014               |
| RESTV<br>genome<br>primer<br>extension                               | RT primer –<br>Tr 20-42                    | <b>AAAACATTATAAAAAACCAATTT</b>                                                                | 2766               |
|                                                                      | Tr 1-42 +1<br>marker                       | <b>CACAAAAAGTCTTAAAAACCTTTTTTCTTTTTTGTGTGTCCG</b>                                             | 2765               |
|                                                                      | Tr 2-42 +2<br>marker                       | <b>AAAACATTATAAAAAACCAATTTTTTCTTTTTTGTGTGTCC</b>                                              | 2854               |
| RESTV<br>antigenome                                                  | RT primer –<br>Le 14-35                    | <b>AGTCTTAAAAACCTTTTTTCT</b>                                                                  | 2959               |

|                     |                      |                                          |      |
|---------------------|----------------------|------------------------------------------|------|
| primer<br>extension | Le 1-35 +1<br>marker | <b>AGTCTTAAAAACCTTTTTCTTTTTGTGTGTCCG</b> | 2960 |
|                     | Le 2-35 +2<br>marker | <b>AGTCTTAAAAACCTTTTTCTTTTTGTGTGTCC</b>  | 3013 |
